# Supplementary material for: Serial intermediate-term quality of life comparison after endoscopic submucosal dissection versus surgery in early gastric cancer patients
Source: Springer Nature journal article supplement (doi:10.1007/s00464-017-5909-y), 2017-10-24
Supplement: MOESM1 [file 15159088]

Supplementary table 1. Patient tumor and treatment characteristics

|  | ESD  (n= 48) | Surgery  (n= 113) | *P* value |
| --- | --- | --- | --- |
| Tumor size (cm), mean±SD | 1.49±0.69 | 3.20±1.67 | <0.001 |
| Tumor location, n (%) |  |  | 0.001 |
| Lower third | 38 (79.2) | 58 (51.3) |  |
| Middle third | 6 (12.5) | 45 (39.8) |  |
| Upper third | 4 (8.3) | 10 (8.9) |  |
| Histologic type, n (%) |  |  | <0.001 |
| Differentiated | 48 (100) | 65 (57.5) |  |
| Undifferentiated | 0 (0) | 48 (42.5) |  |
| Type of gastrectomy, n (%) |  |  | - |
| Subtotal gastrectomy with Billroth I anastomosis | - | 34 (30.1) |  |
| Subtotal gastrectomy with Billroth II anastomosis | - | 65 (57.5) |  |
| Total gastrectomy |  | 14 (12.4) |  |
| Mode of surgery, n (%) |  |  | - |
| Laparoscopy | - | 46 (40.7) |  |
| Open | - | 67 (59.3) |  |
| Pathologic stage*, n (%) |  |  | <0.001 |
| T1aN0M0 | 47 (97.9) | 60 (53.1) |  |
| T1bN0M0 | 1 (2.1) | 46 (40.7) |  |
| T1bN1M0 | 0 (0) | 7 (6.2) |  |
| Abbreviation: ESD, endoscopic submucosal dissection; SD, standard deviation.  *Pathologic stages were classified according to the 7th edition of the International Union Against Cancer/American Joint Committee on Cancer TNM classification system. | | | |
